# Supplementary material for: Genomes of two invasive Adelges species (hemlock woolly adelgid and pineapple gall adelgid) enable characterization of nicotinic acetylcholine receptors
Source: PubMed Central journal article supplement (PMC11601503; doi:10.1101/2024.11.21.624573), 2024-11-26
Supplement: media-10.pdf [file media-10.pdf]

# PromethION 24 (PCA100015) Final report

Dec 18, 23, 3:18 PM UTC-4:00 — Dec 22, 23, 3:18 PM UTC-4:00  
2023DEC18\_Wegrzyn\_HWA\_fulllength\_clean\_2023DEC18\_Wegrzyn\_HWA\_fulllength\_clean\_3C

Protocol run ID: 1b7971fb-bf36-402e-a5a1-030b814af096

[Run summary](#) | [Run configuration](#) | [Sequence output](#) | [Run health](#) | [Run log](#)

## Run summary

### DATA OUTPUT

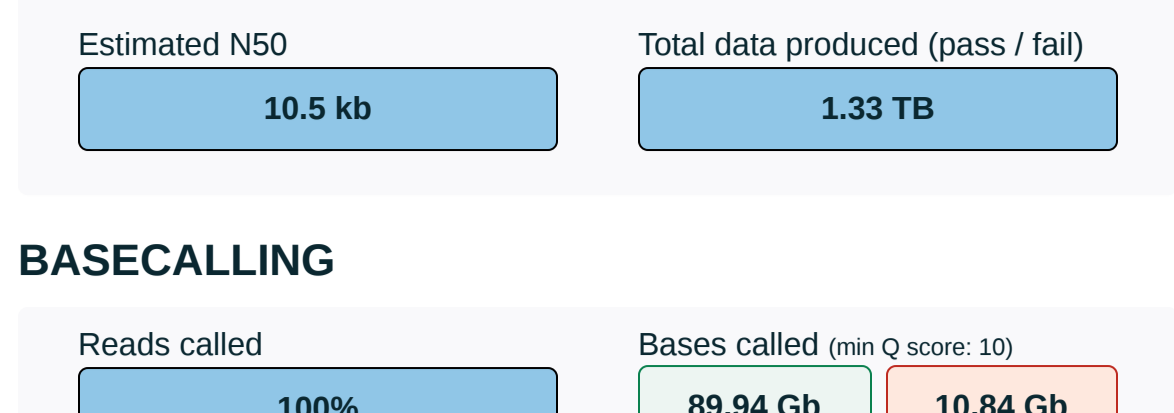

### RUN DURATION

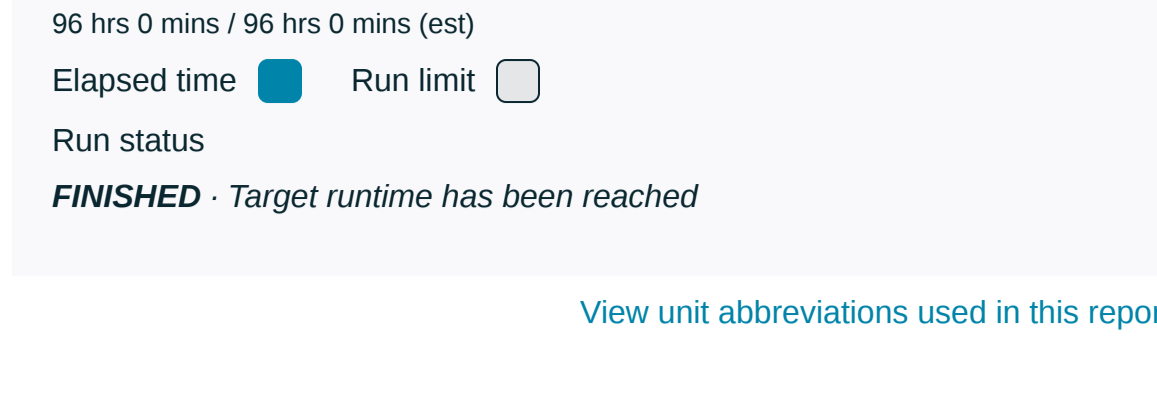

### BASECALLING

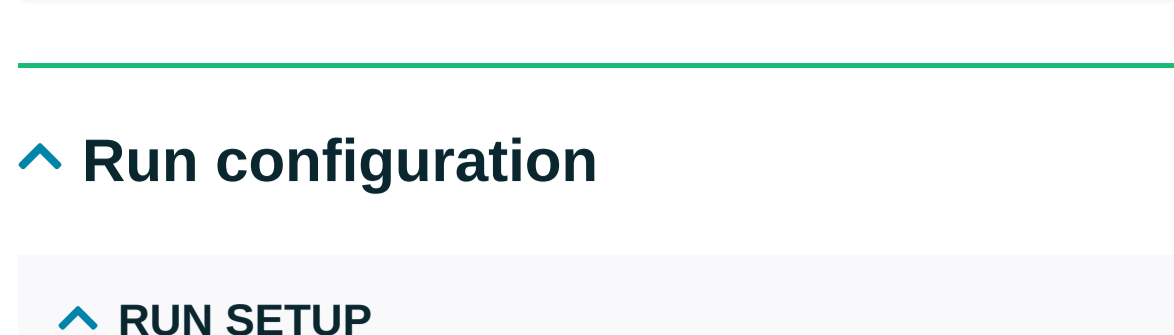

## Run configuration

### RUN SETUP

|                      |             |
|----------------------|-------------|
| Flow cell type       | FLO-PRO114M |
| Flow cell type alias | FLO-PRO114M |
| Flow cell ID         | PAU00939    |
| Kit type             | SQK-LSK114  |

### RUN SETTINGS

|                          |                                     |
|--------------------------|-------------------------------------|
| Run limit                | 96 hrs                              |
| Active channel selection | On                                  |
| Pore scan freq.          | 1.5 hrs                             |
| Reserved pores           | On                                  |
| Minimum read length      | 200 bp                              |
| Read splitting           | On                                  |
| Basecalling              | Super-accurate basecalling, 400 bps |
| Modified basecalling     | On                                  |
| Modified base context    | 5mC & 5hmC                          |

### DATA OUTPUT SETTINGS

|                    |                                                                                                                         |
|--------------------|-------------------------------------------------------------------------------------------------------------------------|
| FAST5 output       | Off                                                                                                                     |
| FASTQ output       | gzipped                                                                                                                 |
| BAM reads per file | 4000                                                                                                                    |
| Bulk file output   | On                                                                                                                      |
| Bulk file output   | Off                                                                                                                     |
| Data location      | /data//2023DEC18_Wegrzyn_HWA_fulllength_clean/2023DEC18_Wegrzyn_HWA_fulllength_clean/20231218_1516_3C_PAU00939_1b7971fb |

### SOFTWARE VERSIONS

|               |          |
|---------------|----------|
| MINKNOW       | 23.07.12 |
| Bream         | 7.7.6    |
| Configuration | 5.7.11   |
| Guppy         | 7.1.4    |
| MINKNOW Core  | 5.7.5    |

## Sequence output

### READ LENGTHS · OUTLIERS REMOVED

The read length graph shows the total number of bases vs the read length. The longest 1% of strands are classified as outliers, and excluded to allow focus on the main body of data.

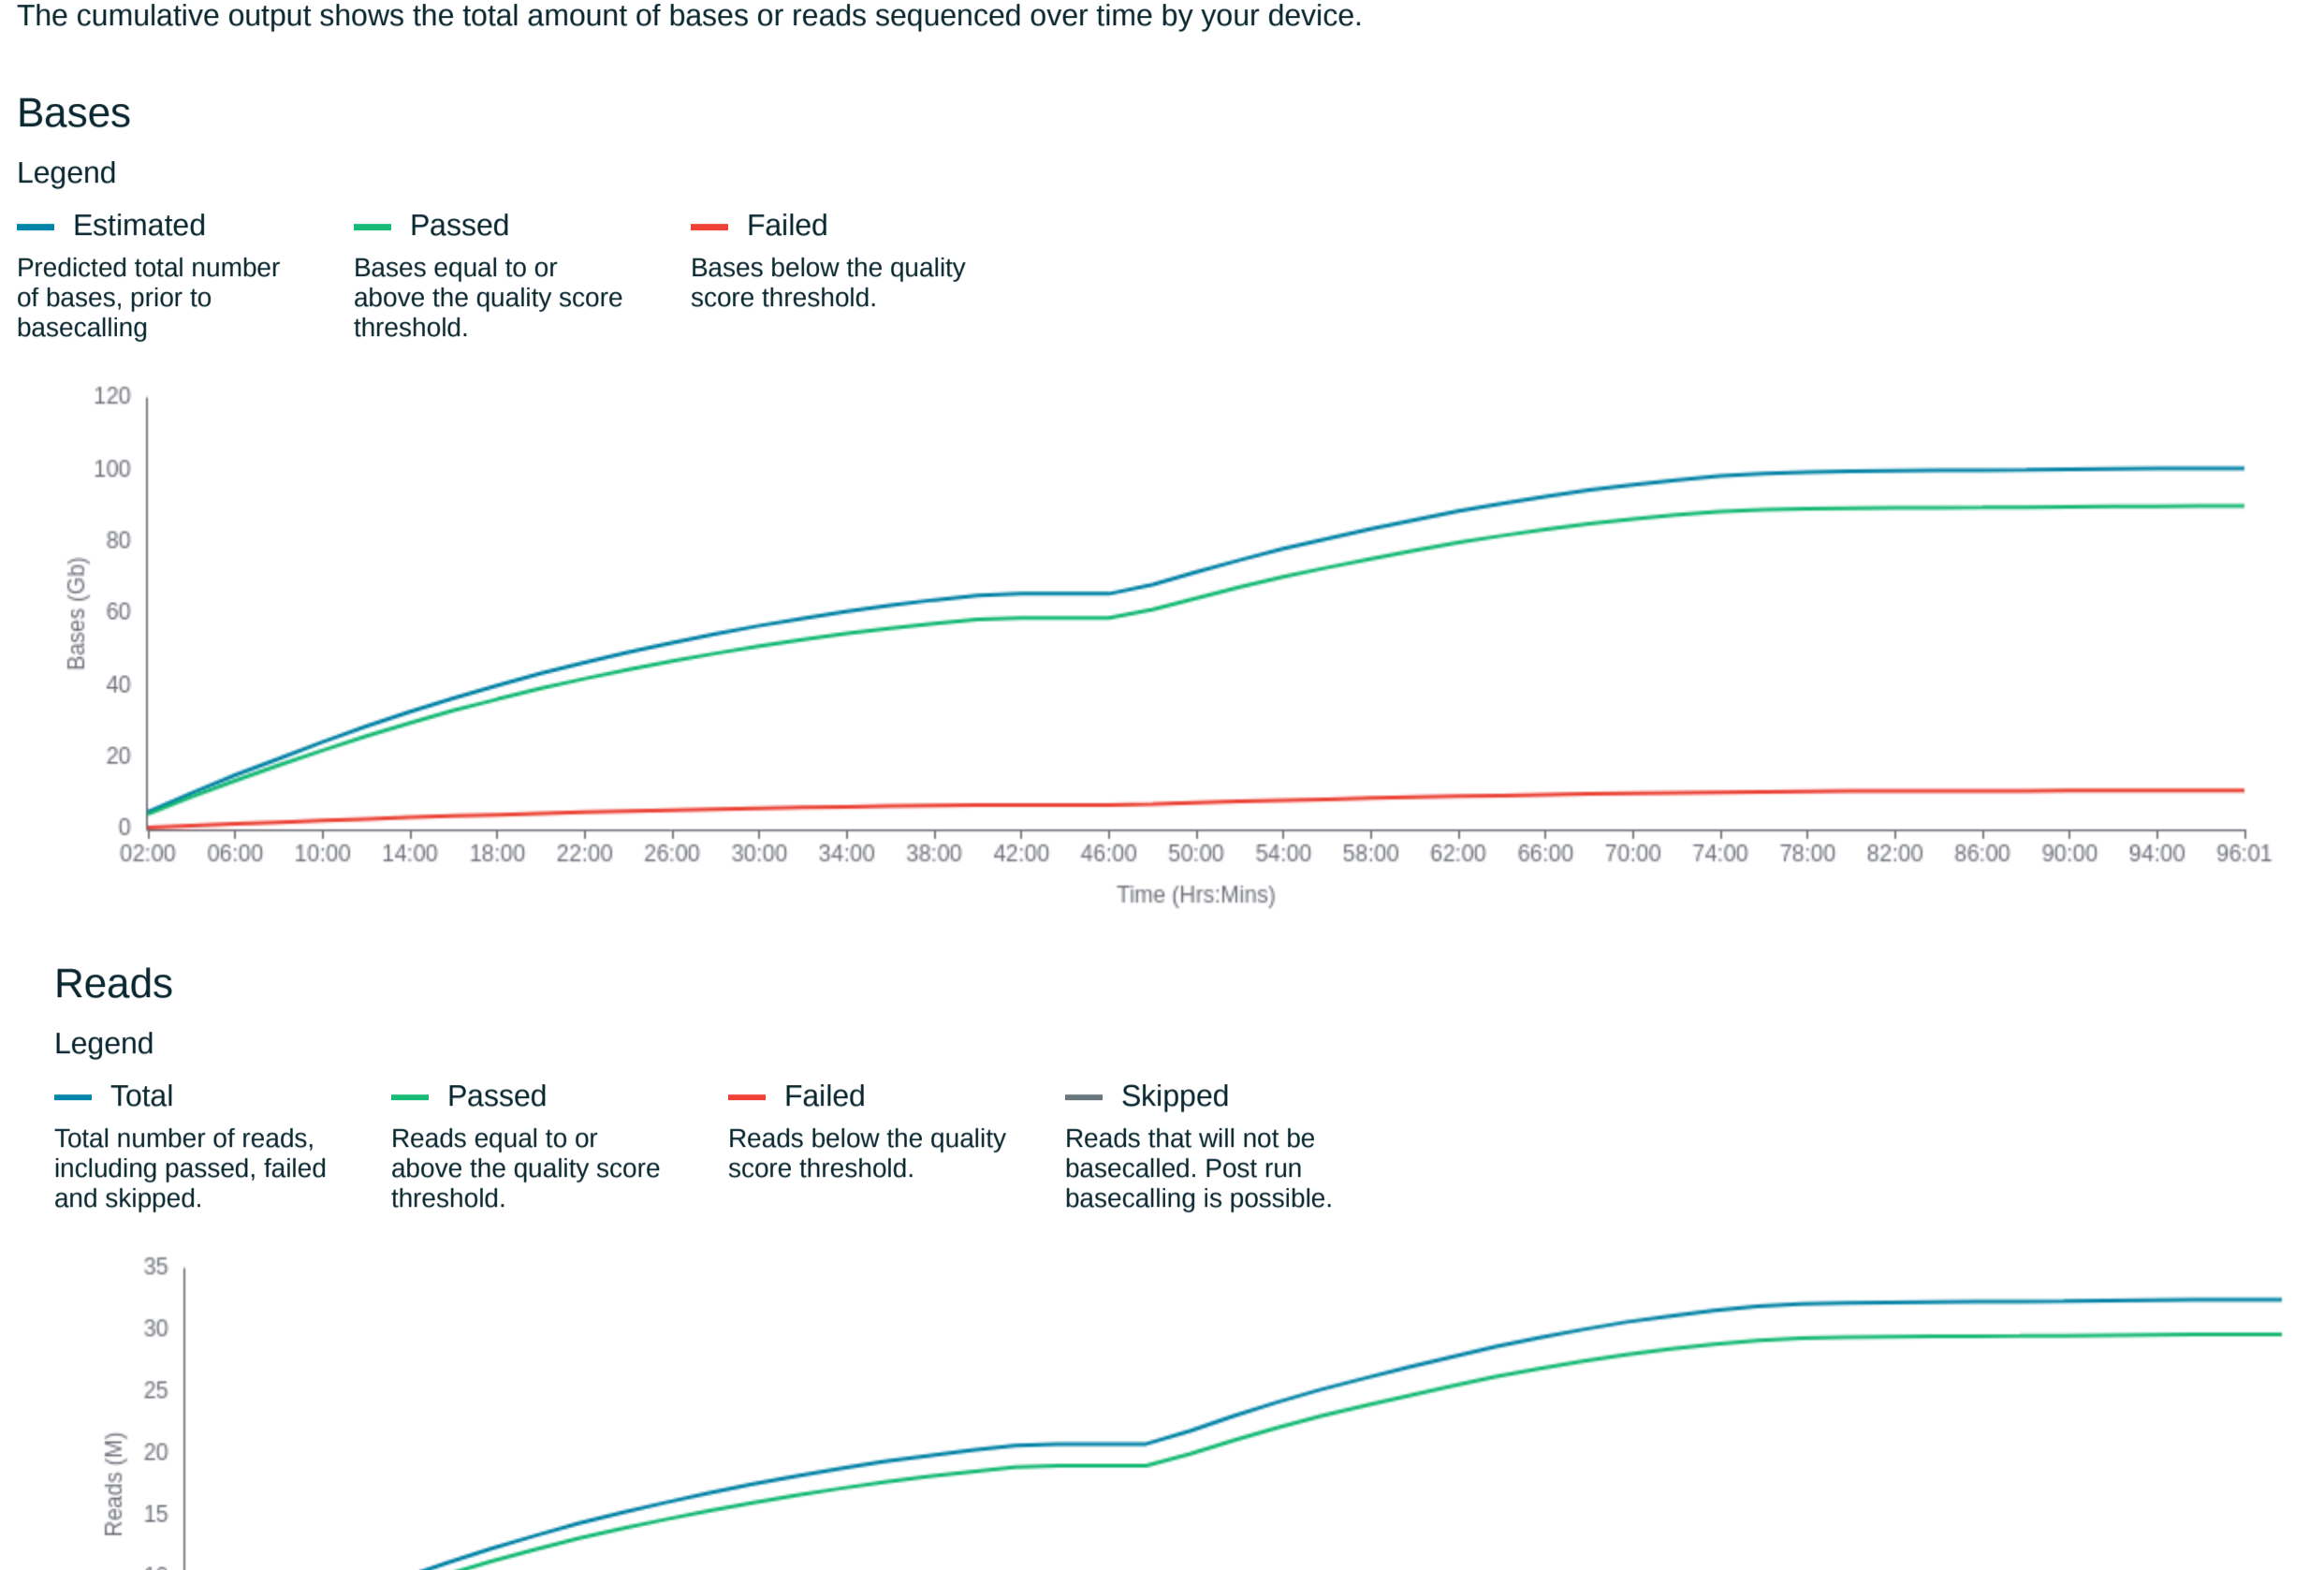

### CUMULATIVE OUTPUT

The cumulative output shows the total amount of bases or reads sequenced over time by your device.

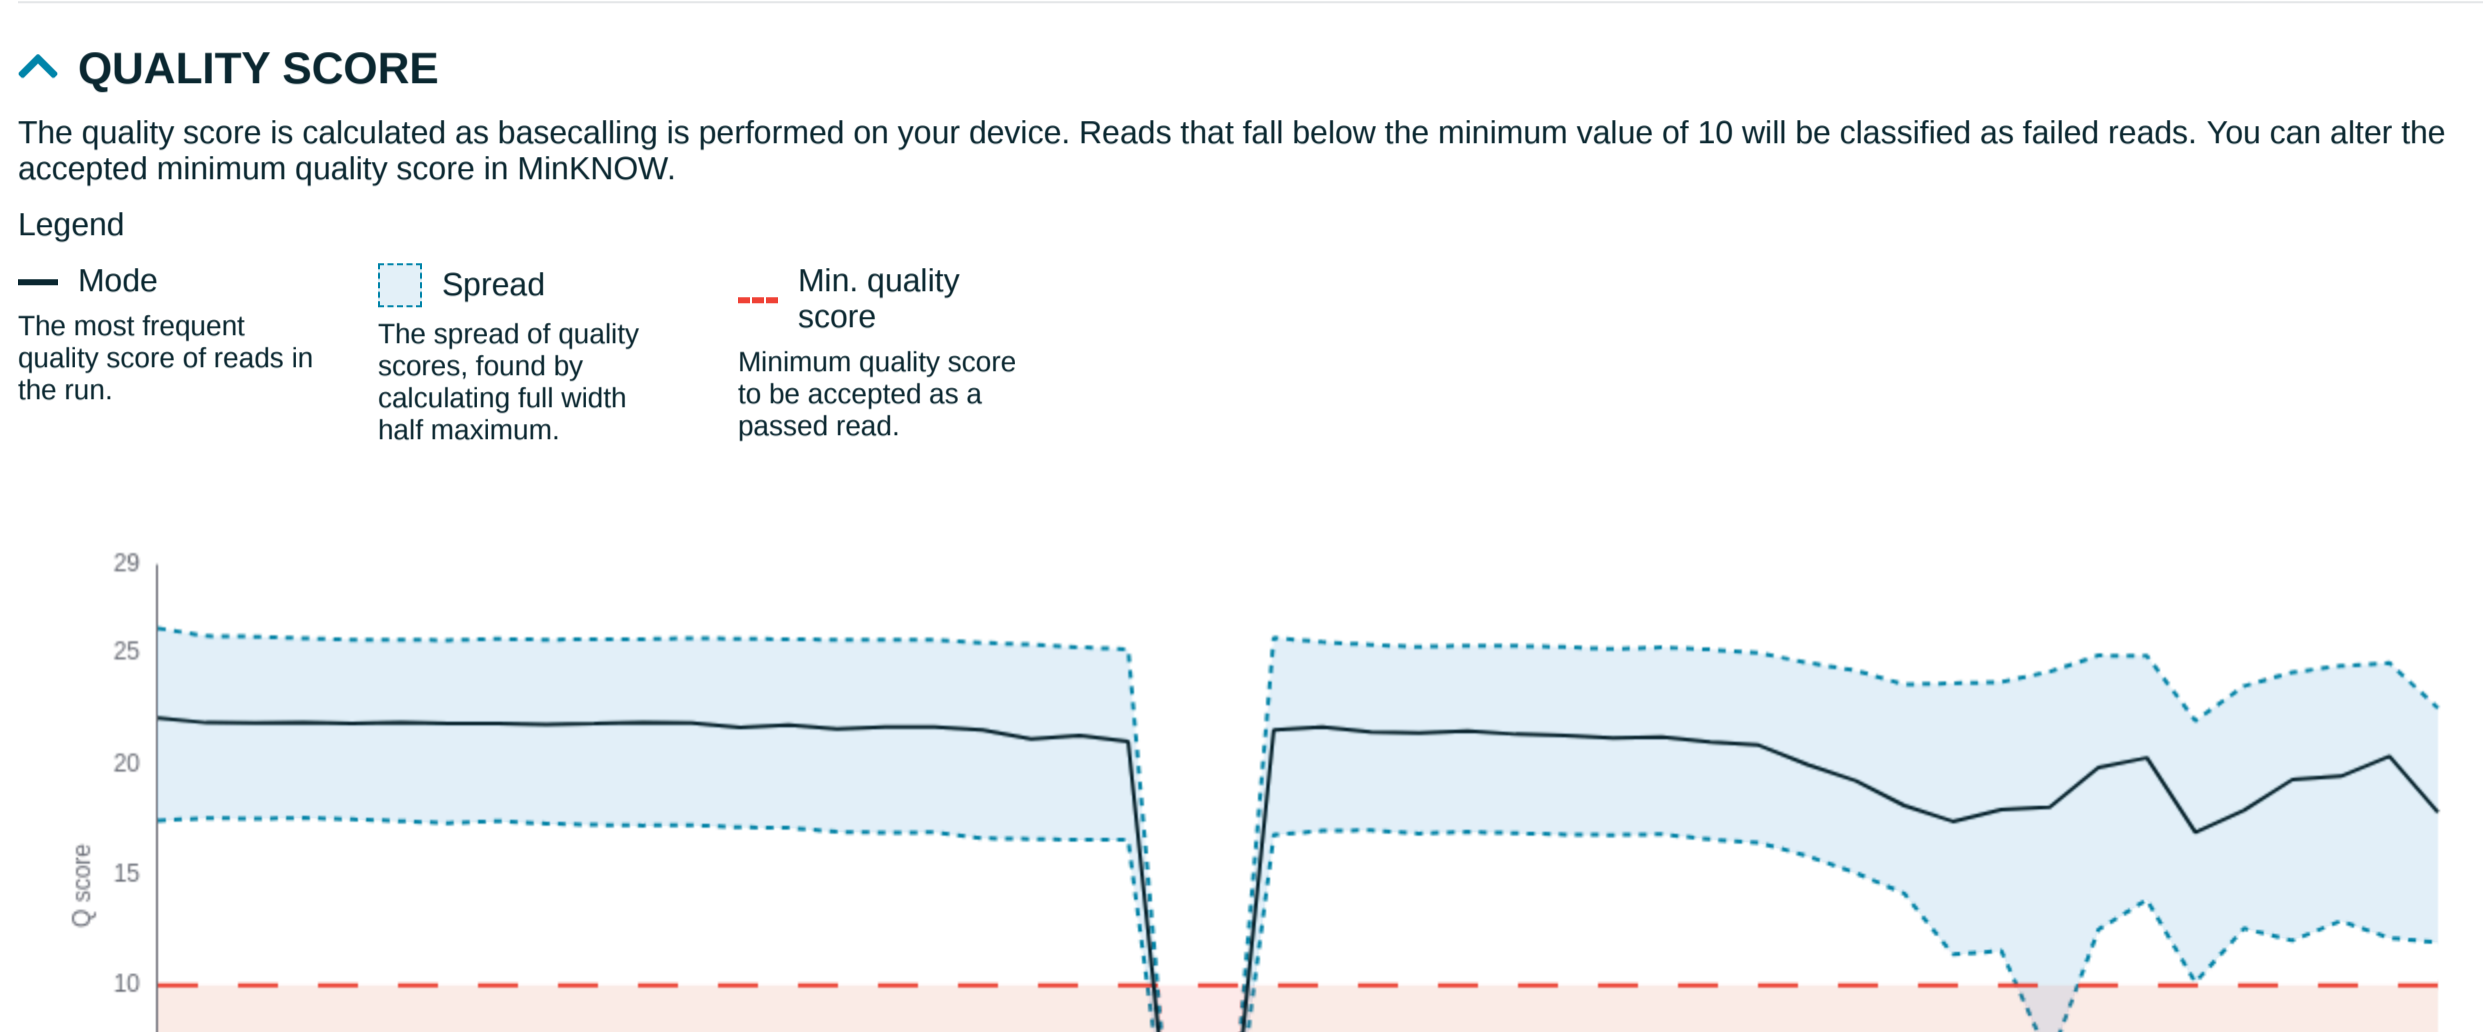

### QUALITY SCORE

The quality score is calculated as basecalling is performed on your device. Reads that fall below the minimum value of 10 will be classified as failed reads. You can alter the accepted minimum quality score in MINKNOW.

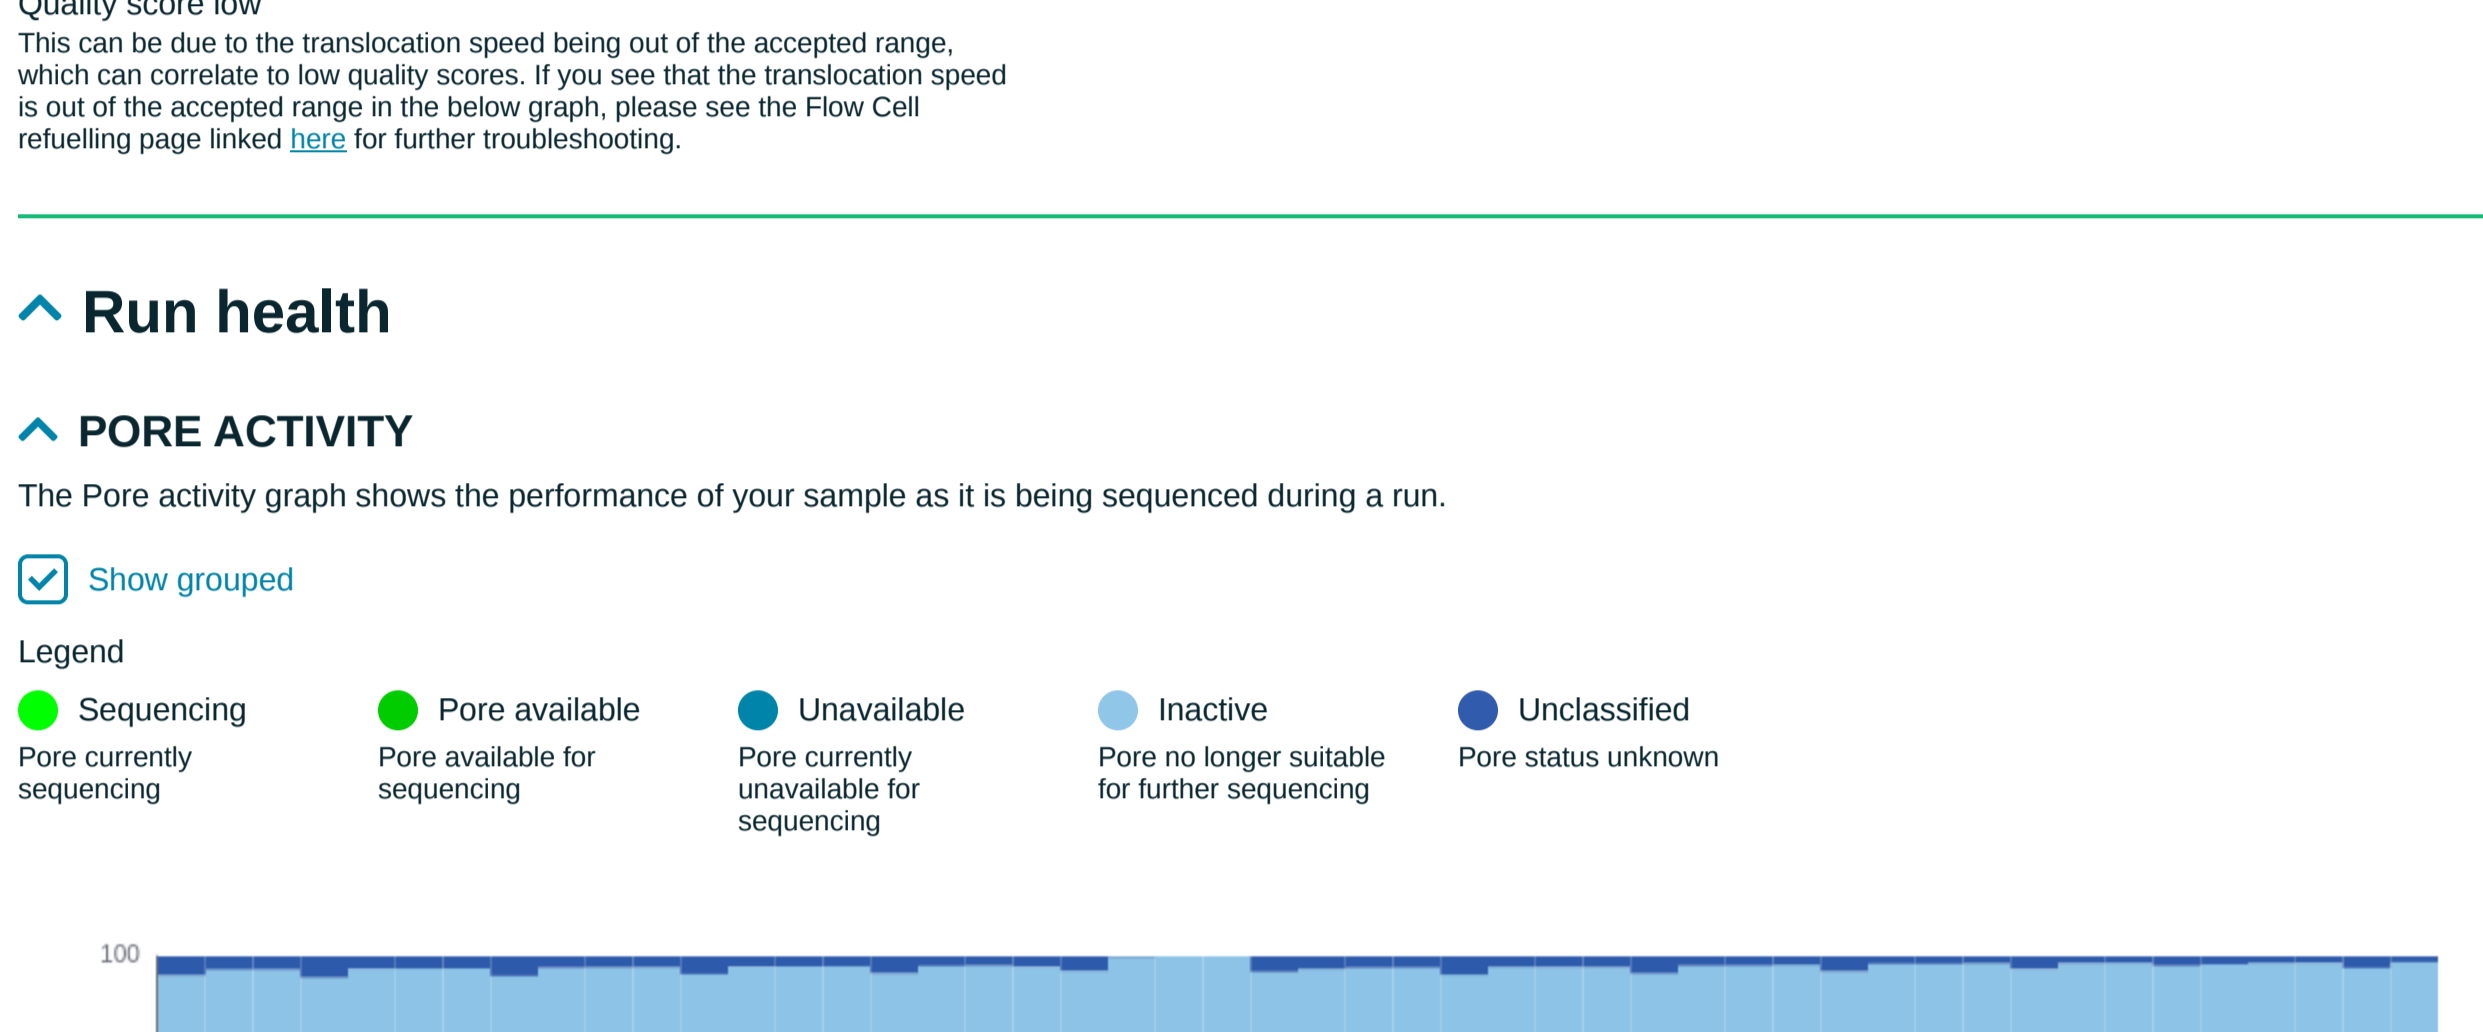

### Troubleshooting

Quality score low  
This can be due to the translocation speed being out of the accepted range, which can correlate to low quality scores. If you see that the translocation speed is out of the accepted ranges in the below graph, please see the Flow Cell reflowing page linked [here](#) for further troubleshooting.

## Run health

### PORE ACTIVITY

The Pore activity graph shows the performance of your sample as it is being sequenced during a run.

Show grouped

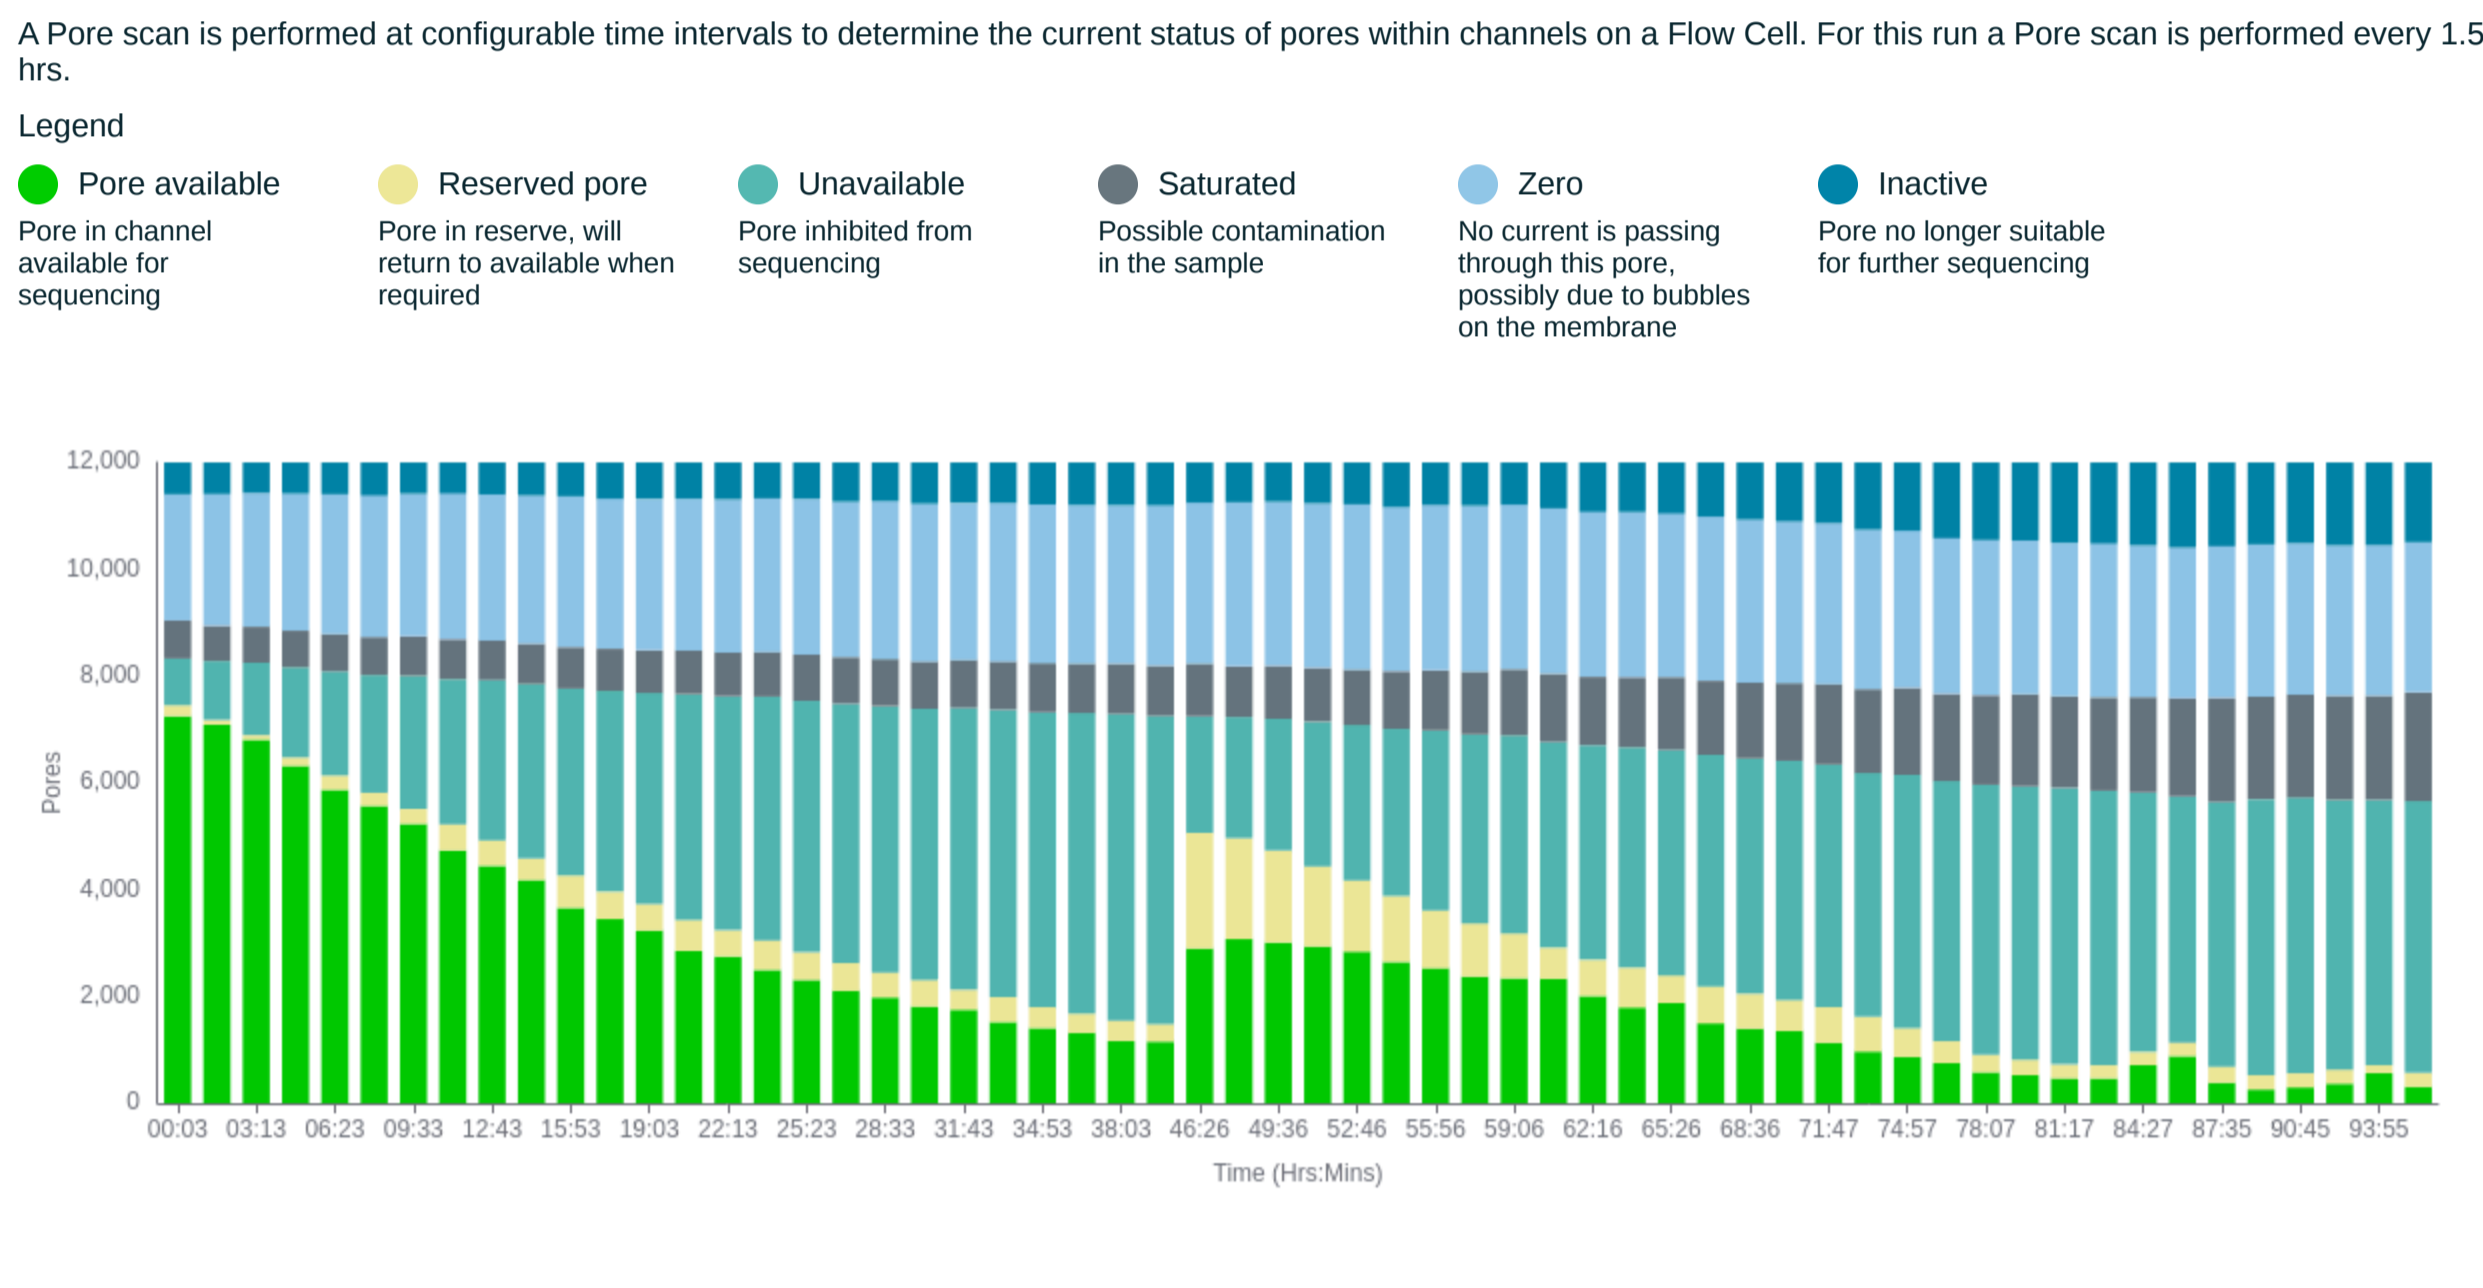

### Troubleshooting

General  
Some commonly seen issues are excess pores classified as Recovering, Open Pore, or Free Adapter. To find out what advice is applicable for your run, visit the [USER GUIDE](#).

### PORE SCAN

A Pore scan is performed at configurable time intervals to determine the current status of pores within channels on a Flow Cell. For this run a Pore scan is performed every 1.5 hrs.

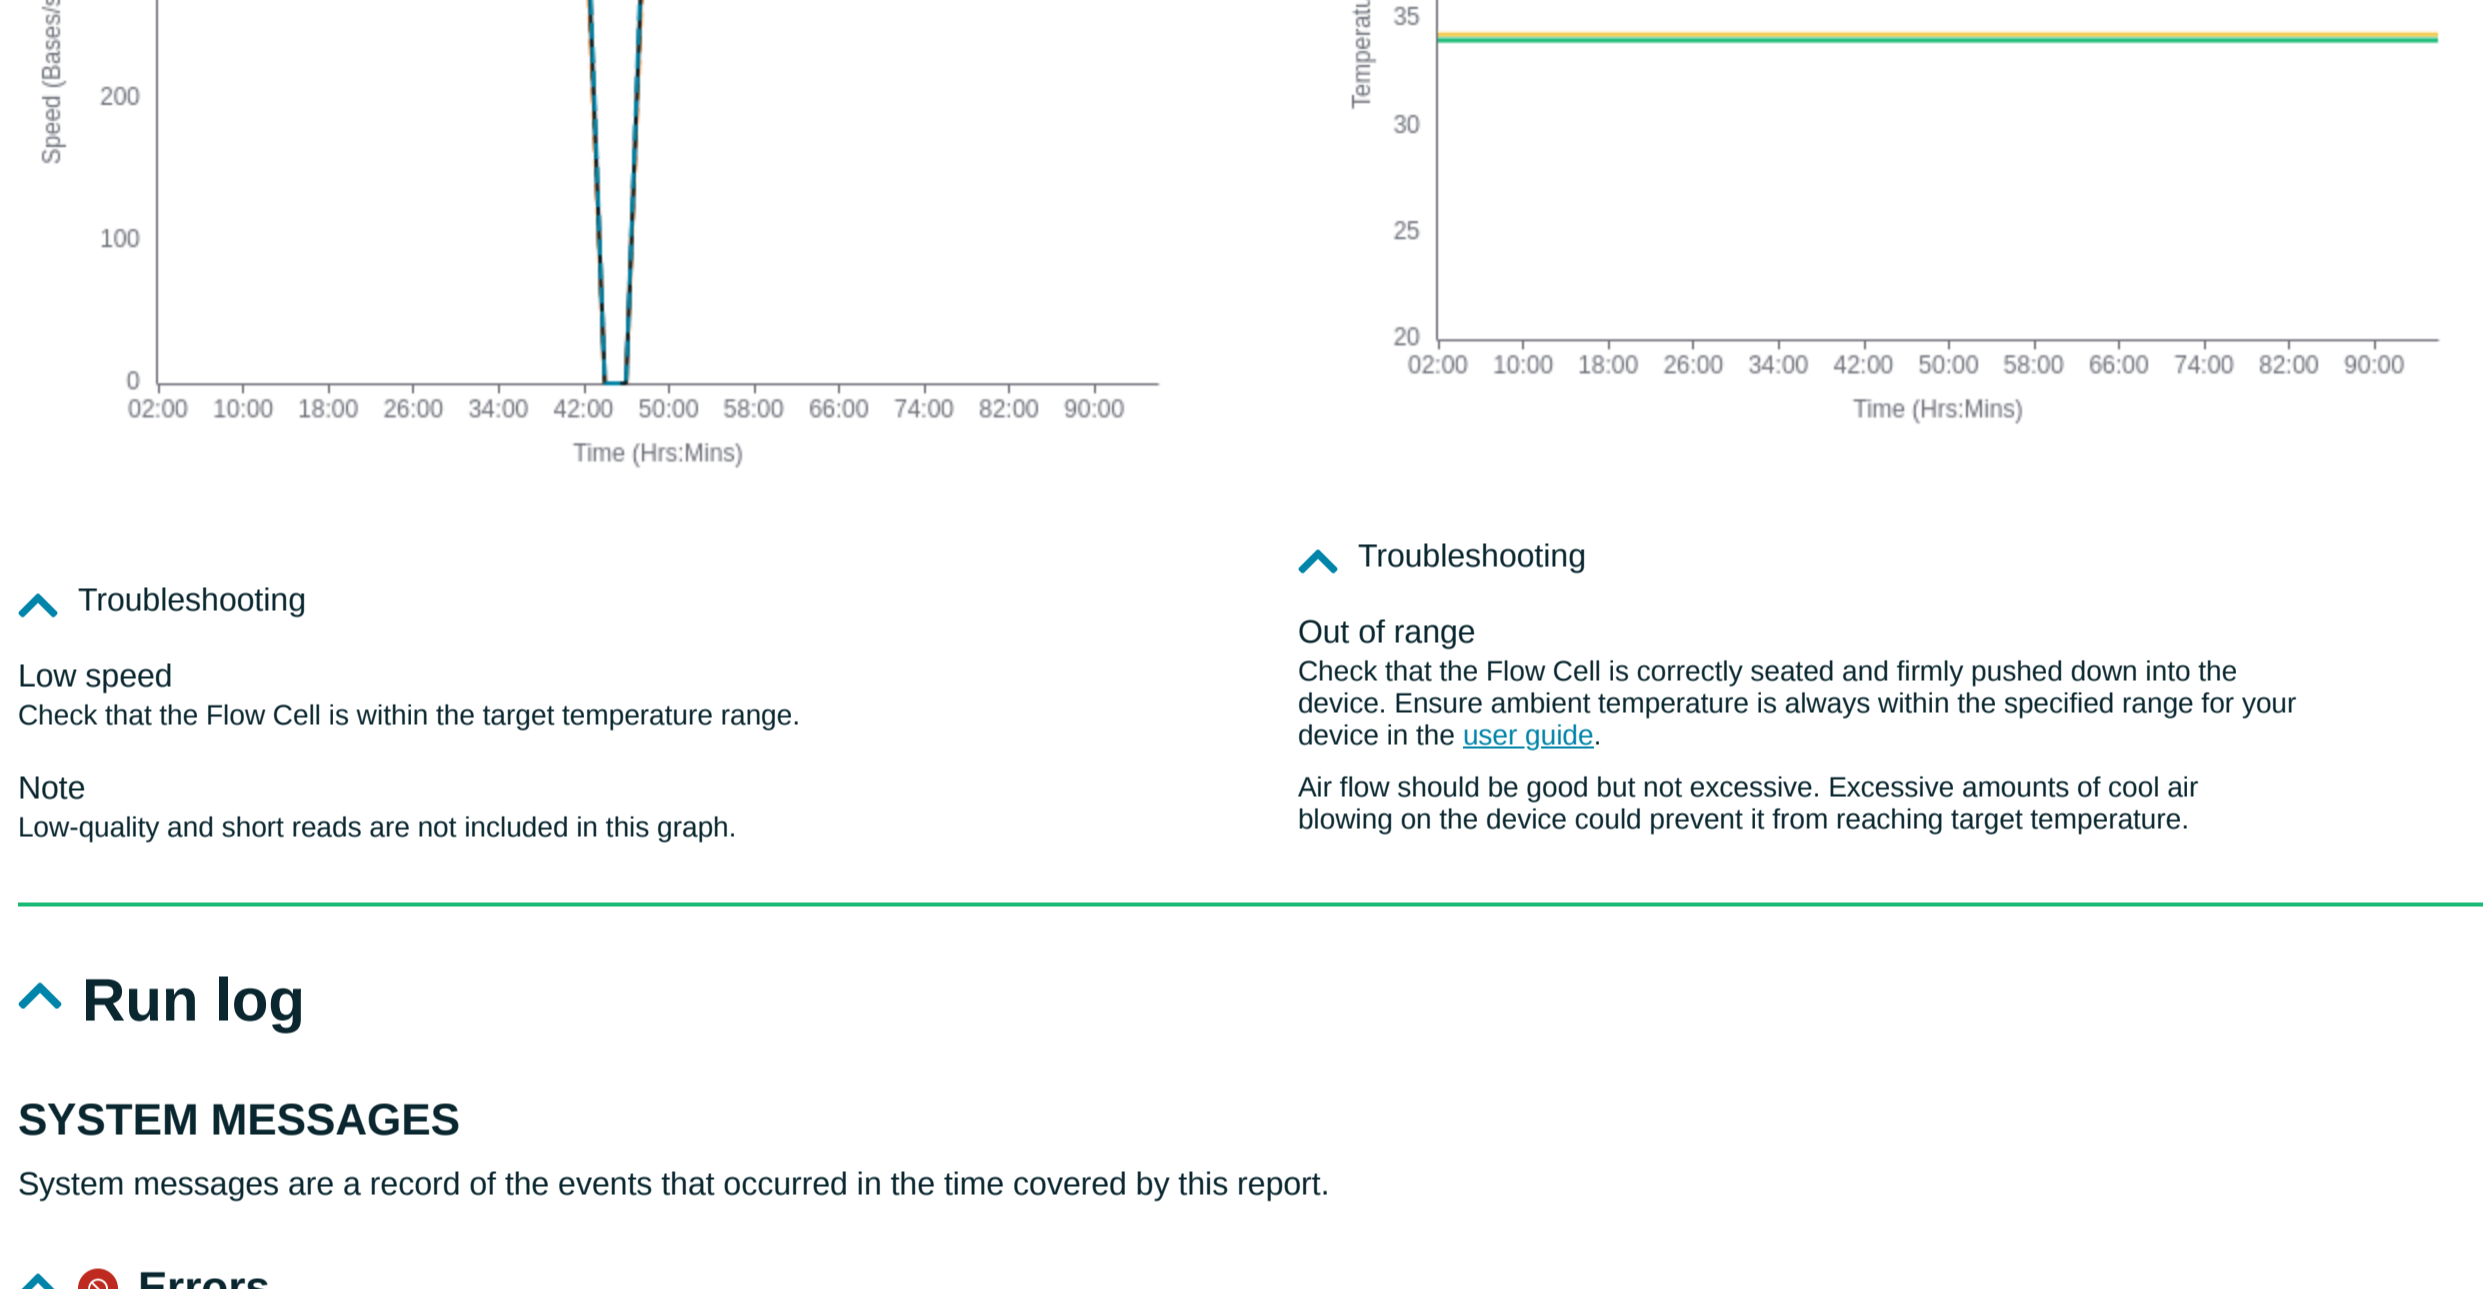

### Troubleshooting

High proportion Unavailable  
If localised to one area of the Flow Cell, this could indicate that an air bubble has been introduced during the flushing/loading steps. If inactivity is spread across the Flow Cell this could be caused by improper loading of the library, please refer to the [user guide](#) for further support.

### TRANSLOCATION SPEED

The translocation speed is the rate at which DNA/RNA travels through pores as it is being sequenced.

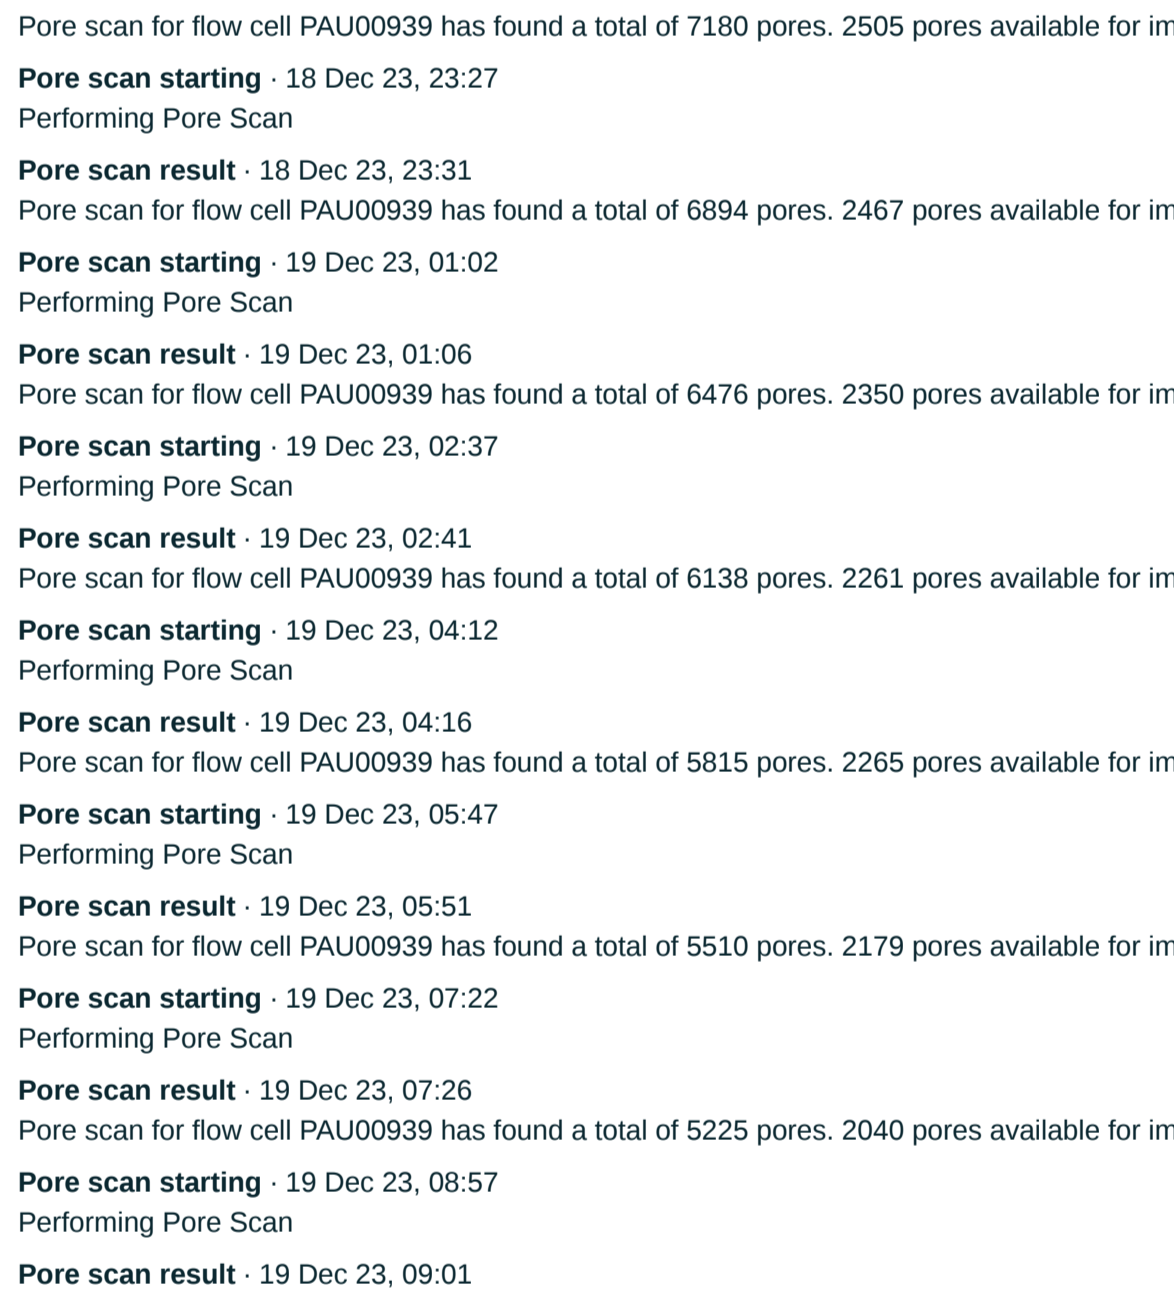

### Troubleshooting

Low speed  
Check that the Flow Cell is within the target temperature range.

### TEMPERATURE

The temperature of the Flow Cell over the run time.

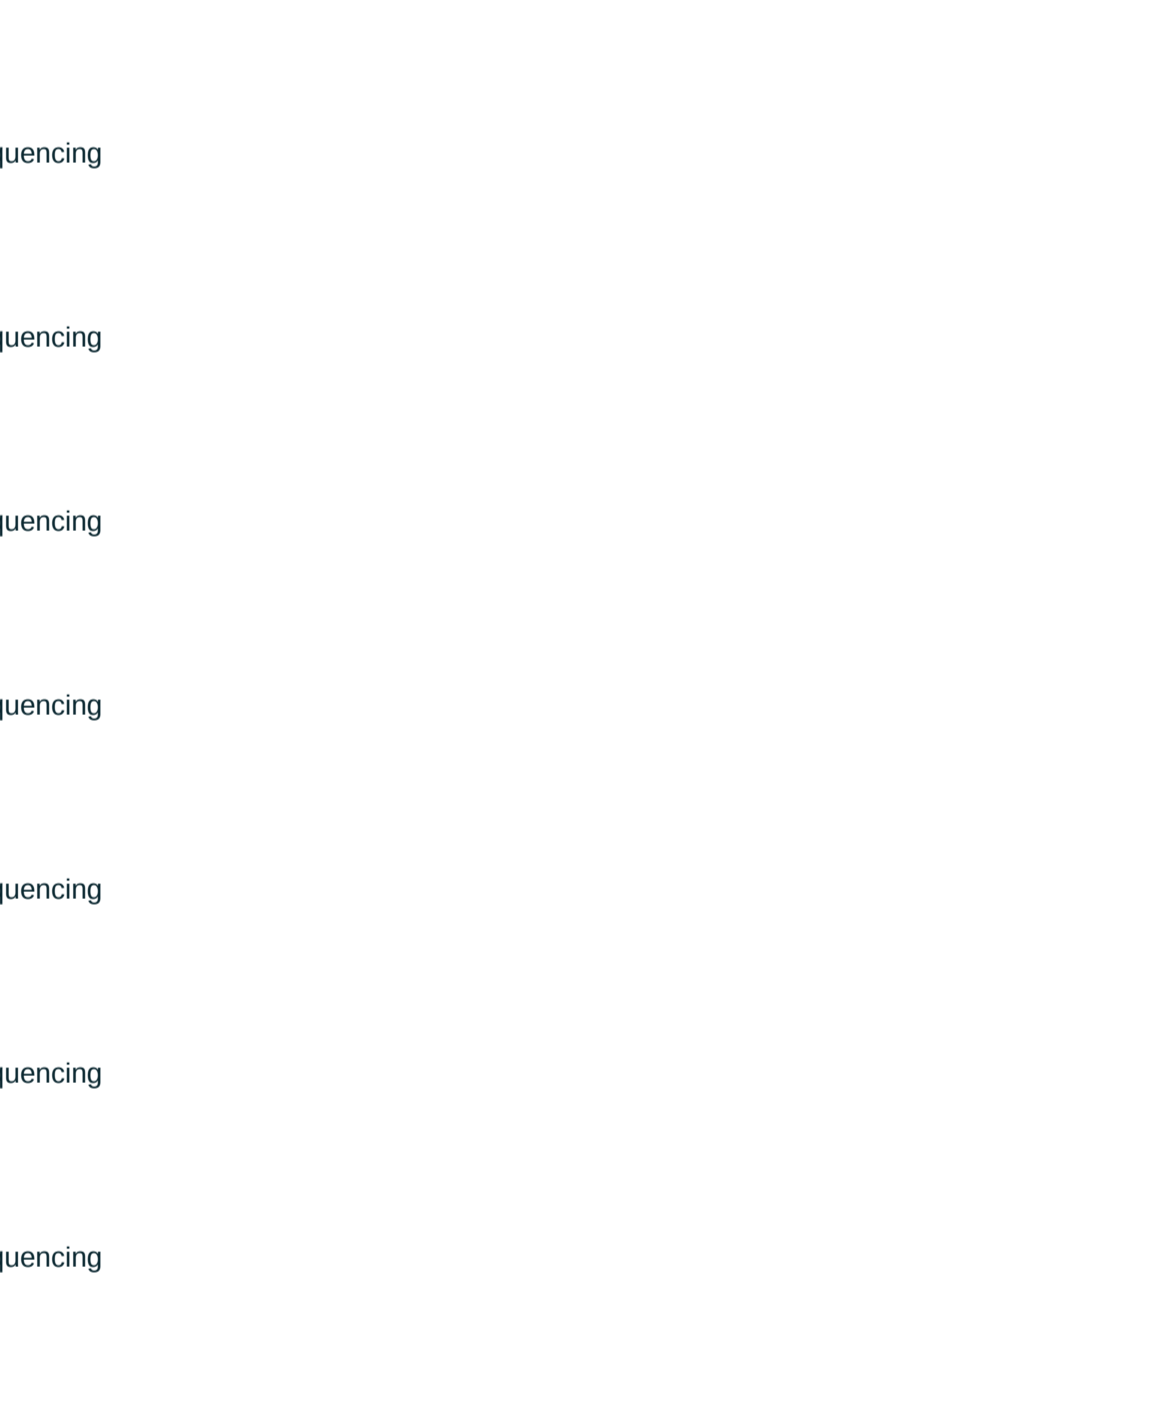

### Troubleshooting

Out of range  
Check that the Flow Cell is correctly seated and firmly pushed down into the device. Ensure ambient temperature is always within the specified range for your device in the [user guide](#).

## Run log

### SYSTEM MESSAGES

System messages are a record of the events that occurred in the time covered by this report.

### Errors

None

### Warnings

None

### Events

- Disk space - 18 Dec 23, 20:16  
Disk data has 13685 GB space remaining
- Waiting for temperature - 18 Dec 23, 20:16  
Waiting up to 300 seconds for temperature to stabilise at 34.0°C
- Starting - 18 Dec 23, 20:16  
Starting sequencing procedure
- Pore scan starting - 18 Dec 23, 20:18  
Performing Pore Scan
- Pore scan result - 18 Dec 23, 20:21  
Pore scan for flow cell PAU00939 has found a total of 7453 pores. 2517 pores available for immediate sequencing
- Message - 18 Dec 23, 20:31  
Setting temperature to reach 34.1°C
- Pore scan starting - 19 Dec 23, 21:52  
Performing Pore Scan
- Pore scan result - 18 Dec 23, 21:56  
Pore scan for flow cell PAU00939 has found a total of 7180 pores. 2505 pores available for immediate sequencing
- Pore scan starting - 18 Dec 23, 23:27  
Performing Pore Scan
- Pore scan result - 18 Dec 23, 23:31  
Pore scan for flow cell PAU00939 has found a total of 6894 pores. 2467 pores available for immediate sequencing
- Pore scan starting - 19 Dec 23, 01:02  
Performing Pore Scan
- Pore scan result - 19 Dec 23, 01:06  
Pore scan for flow cell PAU00939 has found a total of 6476 pores. 2350 pores available for immediate sequencing
- Pore scan starting - 19 Dec 23, 02:37  
Performing Pore Scan
- Pore scan result - 19 Dec 23, 02:41  
Pore scan for flow cell PAU00939 has found a total of 6138 pores. 2261 pores available for immediate sequencing
- Pore scan starting - 19 Dec 23, 04:12  
Performing Pore Scan
- Pore scan result - 19 Dec 23, 04:16  
Pore scan for flow cell PAU00939 has found a total of 5815 pores. 2265 pores available for immediate sequencing
- Pore scan starting - 19 Dec 23, 05:47  
Performing Pore Scan
- Pore scan result - 19 Dec 23, 05:51  
Pore scan for flow cell PAU00939 has found a total of 5510 pores. 2179 pores available for immediate sequencing
- Pore scan starting - 19 Dec 23, 07:22  
Performing Pore Scan
- Pore scan result - 19 Dec 23, 07:26  
Pore scan for flow cell PAU00939 has found a total of 5225 pores. 2040 pores available for immediate sequencing
- Pore scan starting - 19 Dec 23, 08:57  
Performing Pore Scan
- Pore scan result - 19 Dec 23, 09:01  
Pore scan for flow cell PAU00939 has found a total of 4923 pores. 2023 pores available for immediate sequencing
- Pore scan starting - 19 Dec 23, 10:32  
Performing Pore Scan
- Pore scan result - 19 Dec 23, 10:36  
Pore scan for flow cell PAU00939 has found a total of 4580 pores. 1975 pores available for immediate sequencing
- Pore scan starting - 19 Dec 23, 12:07  
Performing Pore Scan
- Pore scan result - 19 Dec 23, 12:11  
Pore scan for flow cell PAU00939 has found a total of 4266 pores. 1757 pores available for immediate sequencing
- Pore scan starting - 19 Dec 23, 13:42  
Performing Pore Scan
- Pore scan result - 19 Dec 23, 13:46  
Pore scan for flow cell PAU00939 has found a total of 3961 pores. 1750 pores available for immediate sequencing
- Pore scan starting - 19 Dec 23, 15:17  
Performing Pore Scan
- Pore scan result - 19 Dec 23, 15:21  
Pore scan for flow cell PAU00939 has found a total of 3731 pores. 1706 pores available for immediate sequencing
- Pore scan starting - 19 Dec 23, 16:52  
Performing Pore Scan
- Pore scan result - 19 Dec 23, 16:56  
Pore scan for flow cell PAU00939 has found a total of 3433 pores. 1529 pores available for immediate sequencing
- Pore scan starting - 19 Dec 23, 18:27  
Performing Pore Scan
- Pore scan result - 19 Dec 23, 18:31  
Pore scan for flow cell PAU00939 has found a total of 3240 pores. 1512 pores available for immediate sequencing
- Pore scan starting - 19 Dec 23, 20:02  
Performing Pore Scan
- Pore scan result - 19 Dec 23, 20:06  
Pore scan for flow cell PAU00939 has found a total of 3050 pores. 1437 pores available for immediate sequencing
- Pore scan starting - 19 Dec 23, 21:37  
Performing Pore Scan
- Pore scan result - 19 Dec 23, 21:41  
Pore scan for flow cell PAU00939 has found a total of 2828 pores. 1371 pores available for immediate sequencing
- Pore scan starting - 19 Dec 23, 23:12  
Performing Pore Scan
- Pore scan result - 19 Dec 23, 23:16  
Pore scan for flow cell PAU00939 has found a total of 2624 pores. 1288 pores available for immediate sequencing
- Pore scan starting - 20 Dec 23, 00:47  
Performing Pore Scan
- Pore scan result - 20 Dec 23, 00:51  
Pore scan for flow cell PAU00939 has found a total of 2449 pores. 1252 pores available for immediate sequencing
- Pore scan starting - 20 Dec 23, 02:22  
Performing Pore Scan
- Pore scan result - 20 Dec 23, 02:26  
Pore scan for flow cell PAU00939 has found a total of 2310 pores. 1173 pores available for immediate sequencing
- Pore scan starting - 20 Dec 23, 03:57  
Performing Pore Scan
- Pore scan result - 20 Dec 23, 04:01  
Pore scan for flow cell PAU00939 has found a total of 2124 pores. 1174 pores available for immediate sequencing
- Pore scan starting - 20 Dec 23, 05:32  
Performing Pore Scan
- Pore scan result - 20 Dec 23, 05:36  
Pore scan for flow cell PAU00939 has found a total of 1986 pores. 1010 pores available for immediate sequencing
- Pore scan starting - 20 Dec 23, 05:36  
Performing Pore Scan
- Pore scan result - 20 Dec 23, 07:11  
Pore scan for flow cell PAU00939 has found a total of 1804 pores. 982 pores available for immediate sequencing
- Pore scan starting - 20 Dec 23, 08:42  
Performing Pore Scan
- Pore scan result - 20 Dec 23, 08:46  
Pore scan for flow cell PAU00939 has found a total of 1678 pores. 935 pores available for immediate sequencing
- Pore scan starting - 20 Dec 23, 10:21  
Performing Pore Scan
- Pore scan result - 20 Dec 23, 10:25  
Pore scan for flow cell PAU00939 has found a total of 1549 pores. 835 pores available for immediate sequencing
- Pore scan starting - 20 Dec 23, 11:52  
Performing Pore Scan
- Pore scan result - 20 Dec 23, 11:56  
Pore scan for flow cell PAU00939 has found a total of 1484 pores. 855 pores available for immediate sequencing
- Pore scan starting - 20 Dec 23, 18:40  
Performing Pore Scan
- Pore scan result - 20 Dec 23, 18:44  
Pore scan for flow cell PAU00939 has found a total of 5064 pores. 1845 pores available for immediate sequencing
- Pore scan starting - 20 Dec 23, 20:15  
Performing Pore Scan
- Pore scan result - 20 Dec 23, 20:19  
Pore scan for flow cell PAU00939 has found a total of 4964 pores. 1830 pores available for immediate sequencing
- Pore scan starting - 20 Dec 23, 21:50  
Performing Pore Scan
- Pore scan result - 20 Dec 23, 21:54  
Pore scan for flow cell PAU00939 has found a total of 4731 pores. 1798 pores available for immediate sequencing
- Pore scan starting - 20 Dec 23, 23:25  
Performing Pore Scan
- Pore scan result - 20 Dec 23, 23:29  
Pore scan for flow cell PAU00939 has found a total of 4437 pores. 1759 pores available for immediate sequencing
- Pore scan starting - 21 Dec 23, 01:00  
Performing Pore Scan
- Pore scan result - 21 Dec 23, 01:04  
Pore scan for flow cell PAU00939 has found a total of 4174 pores. 1689 pores available for immediate sequencing
- Pore scan starting - 21 Dec 23, 02:35  
Performing Pore Scan
- Pore scan result - 21 Dec 23, 02:39  
Pore scan for flow cell PAU00939 has found a total of 3882 pores. 1581 pores available for immediate sequencing
- Pore scan starting - 21 Dec 23, 04:10  
Performing Pore Scan
- Pore scan result - 21 Dec 23, 04:14  
Pore scan for flow cell PAU00939 has found a total of 3610 pores. 1538 pores available for immediate sequencing
- Pore scan starting - 21 Dec 23, 05:45  
Performing Pore Scan
- Pore scan result - 21 Dec 23, 05:49  
Pore scan for flow cell PAU00939 has found a total of 3369 pores. 1482 pores available for immediate sequencing
- Pore scan starting - 21 Dec 23, 07:20  
Performing Pore Scan
- Pore scan result - 21 Dec 23, 07:24  
Pore scan for flow cell PAU00939 has found a total of 3181 pores. 1460 pores available for immediate sequencing
- Pore scan starting - 21 Dec 23, 08:55  
Performing Pore Scan
- Pore scan result - 21 Dec 23, 08:59  
Pore scan for flow cell PAU00939 has found a total of 2912 pores. 1493 pores available for immediate sequencing
- Pore scan starting - 21 Dec 23, 10:30  
Performing Pore Scan
- Pore scan result - 21 Dec 23, 10:34  
Pore scan for flow cell PAU00939 has found a total of 2686 pores. 1286 pores available for immediate sequencing
- Pore scan starting - 21 Dec 23, 12:05  
Performing Pore Scan
- Pore scan result - 21 Dec 23, 12:09  
Pore scan for flow cell PAU00939 has found a total of 2537 pores. 1167 pores available for immediate sequencing
- Pore scan starting - 21 Dec 23, 13:41  
Performing Pore Scan
- Pore scan result - 21 Dec 23, 13:44  
Pore scan for flow cell PAU00939 has found a total of 2395 pores. 1289 pores available for immediate sequencing
- Pore scan starting - 21 Dec 23, 15:16  
Performing Pore Scan
- Pore scan result - 21 Dec 23, 15:19  
Pore scan for flow cell PAU00939 has found a total of 2189 pores. 1031 pores available for immediate sequencing
- Pore scan starting - 21 Dec 23, 16:51  
Performing Pore Scan
- Pore scan result - 21 Dec 23, 16:54  
Pore scan for flow cell PAU00939 has found a total of 2049 pores. 979 pores available for immediate sequencing
- Pore scan starting - 21 Dec 23, 18:26  
Performing Pore Scan
- Pore scan result - 21 Dec 23, 18:30  
Pore scan for flow cell PAU00939 has found a total of 1935 pores. 1002 pores available for immediate sequencing
- Pore scan starting - 21 Dec 23, 20:01  
Performing Pore Scan
- Pore scan result - 21 Dec 23, 20:05  
Pore scan for flow cell PAU00939 has found a total of 1799 pores. 873 pores available for immediate sequencing
- Pore scan starting - 21 Dec 23, 21:40  
Performing Pore Scan
- Pore scan result - 21 Dec 23, 21:44  
Pore scan for flow cell PAU00939 has found a total of 1618 pores. 751 pores available for immediate sequencing
- Pore scan starting - 21 Dec 23, 23:11  
Performing Pore Scan
- Pore scan result - 21 Dec 23, 23:15  
Pore scan for flow cell PAU00939 has found a total of 1408 pores. 712 pores available for immediate sequencing
- Pore scan starting - 22 Dec 23, 00:46  
Performing Pore Scan
- Pore scan result - 22 Dec 23, 00:50  
Pore scan for flow cell PAU00939 has found a total of 1161 pores. 630 pores available for immediate sequencing
- Pore scan starting - 22 Dec 23, 02:21  
Performing Pore Scan
- Pore scan result - 22 Dec 23, 02:25  
Pore scan for flow cell PAU00939 has found a total of 907 pores. 498 pores available for immediate sequencing
- Pore scan starting - 22 Dec 23, 03:56  
Performing Pore Scan
- Pore scan result - 22 Dec 23, 04:00  
Pore scan for flow cell PAU00939 has found a total of 816 pores. 473 pores available for immediate sequencing
- Pore scan starting - 22 Dec 23, 05:31  
Performing Pore Scan
- Pore scan result - 22 Dec 23, 05:35  
Pore scan for flow cell PAU00939 has found a total of 727 pores. 422 pores available for immediate sequencing
- Pore scan starting - 22 Dec 23, 07:06  
Performing Pore Scan
- Pore scan result - 22 Dec 23, 07:10  
Pore scan for flow cell PAU00939 has found a total of 711 pores. 424 pores available for immediate sequencing
- Pore scan starting - 22 Dec 23, 08:41  
Performing Pore Scan
- Pore scan result - 22 Dec 23, 08:45  
Pore scan for flow cell PAU00939 has found a total of 961 pores. 639 pores available for immediate sequencing
- Pore scan starting - 22 Dec 23, 10:15  
Performing Pore Scan
- Pore scan result - 22 Dec 23, 10:19  
Pore scan for flow cell PAU00939 has found a total of 1138 pores. 743 pores available for immediate sequencing
- Pore scan starting - 22 Dec 23, 11:49  
Performing Pore Scan
- Pore scan result - 22 Dec 23, 11:53  
Pore scan for flow cell PAU00939 has found a total of 686 pores. 353 pores available for immediate sequencing
- Pore scan starting - 22 Dec 23, 13:24  
Performing Pore Scan
- Pore scan result - 22 Dec 23, 13:28  
Pore scan for flow cell PAU00939 has found a total of 526 pores. 245 pores available for immediate sequencing
- Pore scan starting - 22 Dec 23, 14:59  
Performing Pore Scan
- Pore scan result - 22 Dec 23, 15:03  
Pore scan for flow cell PAU00939 has found a total of 561 pores. 283 pores available for immediate sequencing
- Pore scan starting - 22 Dec 23, 16:34  
Performing Pore Scan
- Pore scan result - 22 Dec 23, 16:38  
Pore scan for flow cell PAU00939 has found a total of 631 pores. 349 pores available for immediate sequencing
- Pore scan starting - 22 Dec 23, 18:09  
Performing Pore Scan
- Pore scan result - 22 Dec 23, 18:13  
Pore scan for flow cell PAU00939 has found a total of 715 pores. 503 pores available for immediate sequencing
- Pore scan starting - 22 Dec 23, 19:44  
Performing Pore Scan
- Pore scan result - 22 Dec 23, 19:47  
Pore scan for flow cell PAU00939 has found a total of 568 pores. 288 pores available for immediate sequencing

### UNIT ABBREVIATIONS

|          |    |          |    |         |      |
|----------|----|----------|----|---------|------|
| Byte     | B  | Base     | b  | Minutes | mins |
| Kilobyte | KB | Kilobase | kb | Hours   | hrs  |
| Megabyte | MB | Megabase | Mb |         |      |
| Gigabyte | GB | Gigabase | Gb |         |      |
| Terabyte | TB | Terabase | Tb |         |      |
